# Supplementary material for: Topological Transition in a 3 nm Thick Al Film Grown by Molecular Beam Epitaxy
Source: Hindawi journal article supplement (doi:10.1155/2019/6376529), 2019-12-27
Supplement: f1 [file 6376529.f1.docx]

**Supporting Information**

**Topological transition in a 3-nm-thick Al film grown by molecular beam epitaxy**

Ankit Kumar1, 2, †, Guan-Ming Su1,†, Chao-Shing Chang3, Ching-Chen Yeh1, Bi-Yi Wu1, Dinesh K. Patel1, Yen-Ting Fan4, Sheng-Di Lin4, *, Lee Chow1, 5, and Chi-Te Liang1, 3, *

1*Department of Physics, National Taiwan University, Taipei 106, Taiwan*

2*Department of Physics, BITS-Pilani, K. K. Birla Goa Campus, Zuarinagar, Goa 403726, India*

3*Graduate Institute of Applied Physics, National Taiwan University, Taipei 106, Taiwan*

4*Department of Electronics Engineering, National Chiao Tung University, Hsinchu 300, Taiwan*

5*Department of Physics, University of Central Florida, Orlando, FL 32816-2385, USA*

† These authors contributed equally to this work

* Correspondence and requests for materials should be addressed to S.-D.L. (email: sdlin@mail.nctu.edu.tw) or C.-T.L. (ctliang@phys.ntu.edu.tw).

**S1 MBE growth of Al nanofilm**

The semi-insulating 2-inch GaAs (001) substrate was first baked in our MBE chamber at 200 oC for 8 hours to remove the moisture on the surface of the substrate. Subsequently, the substrate was heated to 400 oC for 5 hours to remove organic residue in a preparation chamber. The wafer was put back in the main chamber. After removing the native oxide on the substrate at 600 oC for 20 minutes, we grew a 200-nm-thick undoped GaAs buffer layer at 580 oC. Subsequently, the GaAs surface temperature was increased to 600 oC with no arsenic flux for 180 seconds to transform the surface into a Ga-rich condition. Importantly, the treated sample was cooled down in the ultra-high-vacuum chamber to 0 0C in order to prevent any surface oxidation. Aluminum film growth starts after the residual arsenic vapor in the chamber was pumped away and the background pressure was lower than 2x10-10 Torr. In our MBE system, the growth rate of the Al films was about 0.1 nm/s. During the sample growth, the substrate was not rotating, and no heater power was applied in order to ensure a low growth temperature. In our system, the minimum reading of our thermometer is 0 0C. We made sure that the reading was always 0 0C but in reality, the growth temperature might as well be lower than 0 0C.

**S2 Device geometry and stability**

The sample was processed into a Hall geometry. The width of the Hall bar and the center-to-center distance between the voltage probes are 40 m and 480 m, respectively. Contact pads made by standard photo lithography are prepared for wire bonding. The key issue is that we use dilute AZ developer in order to avoid etching the Al nanofilm. The Al nanofilm devices are stable in air over a long period of time (over a year), possibly protected by the overlaying AlOx layer which is formed when the Al wafer was removed from the MBE chamber for *ex*-*situ* processing.

**S3 Low-temperature resistance measurements**

The transport experiments were performed in an Oxford Triton 200 cryo-free He3/He4 dilution refrigerator. The magnetic field is applied perpendicular to the plane of the Al film. Although the base temperature of our dilution refrigerator is around 13 mK, the lowest measurement temperature was set at 0.25 K. The reason for this is that when the sample undergoes a superconductor/metal transition at a high critical current, a large heat dissipation can occur, and at the base temperature the cooling power of our fridge is lower than heat dissipation of our device, leading to a sudden increase of the measurement temperature.

Standard four-terminal dc resistance measurements were performed on our Al sample. A Keithley 2400 current source was used to provide a constant current which flows between the source and drain contacts. A Keithley 2000 multi-meter was used to measure the voltage drop between the voltage probes.
